# Supplementary material for: Target Cell APOBEC3C Can Induce Limited G-to-A Mutation in HIV-1
Source: PubMed Central journal article supplement (PMC2042017; doi:10.1371/journal.ppat.0030153), 2007-10-26
Supplement: ppat.0030153.sg001.pdf [file ppat.0030153.sg001.pdf]

|       |        |                                                                |        |
|-------|--------|----------------------------------------------------------------|--------|
| 210WW | 1      | CTTGCTGAAGCGCGCACGGCAAGAGGGCGAGGGGCGGCGACTGGTGAGTACGCCAAAACCTT | 60     |
| 210MM | 1      | .....                                                          | 60     |
| NL4-3 | 1      | .....A..                                                       | 60     |
| LAI   | 1      | .....A..                                                       | 60     |
| 210WW | 61     | TTGACTAGCGGAGGCTAGAAGGAGAGAGATGGGTGCGAGAGCGTCGGTATTAAGCGGGGG   | 120    |
| 210MM | 61     | .....T.....                                                    | 120    |
| NL4-3 | 61     | .....                                                          | 120    |
| LAI   | 61     | .....A.....                                                    | 120    |
| 210WW | 121    | AAAATTAGATAAAATGGGAGAAAATTCGGTTACGGCCAGGGGGAAAGAAAAATATAAAATT  | 180    |
| 210MM | 121    | .....                                                          | 180    |
| NL4-3 | 121    | .G.....A.....A.....C.....C.                                    | 180    |
| LAI   | 121    | .G.....CG.....A.....A.....                                     | 180    |
| 210WW | 181    | AAAACATCTAGTATGGGCAAGCAGGGAGTTAGAACGATTTCGCAGTCAATCCTGGCCTTTT  | 240    |
| 210MM | 181    | .....C.....                                                    | 240    |
| NL4-3 | 181    | .....A.....C.....T.....                                        | 240    |
| LAI   | 181    | .....A.....C.....T.....G..                                     | 240    |
| 210WW | 241    | AGAGACATCAGAAGGCTGTAGACAAATATTGGAACAGCTACAACCATCCCTTAAGACAGG   | 300    |
| 210MM | 241    | .....G.....A.....G.....                                        | 300    |
| NL4-3 | 241    | .....C..G.....C.....                                           | 300    |
| LAI   | 241    | ...A.....C..G.....C.....                                       | 300    |
| 210WW | 301    | ATCAGAAGAACTTAGATCATTATTCAATGCAGTAGCAACCCTCTATTGTGTGCATCAAGG   | 360    |
| 210MM | 301    | .....T.....                                                    | 360    |
| NL4-3 | 301    | .....AT..A..A...GT.....A..                                     | 360    |
| LAI   | 301    | .....AT..A.....                                                | 360    |
| 210WW | 361    | GATAGATGTAAAAGACACCAAGGAAGCTTTAGACAAGATAGAGGAAGAACAAAACAAAAG   | 420    |
| 210MM | 361    | .....G.....                                                    | 420    |
| NL4-3 | 361    | .....C..T.....G.....                                           | 420    |
| LAI   | 361    | .....GA.....G.....                                             | 420    |
| 210WW | 421    | TAAGAAAAAGGCACAGCAAGCAGCAGCTGACACAGGAAGCTGCAGCAGCCAAGTCAGCCA   | 480    |
| 210MM | 421    | .....A.....                                                    | 480    |
| NL4-3 | 421    | .....A--A.....G.....                                           | 477    |
| LAI   | 421    | .....A.....CA--.....G.....                                     | 477    |
| 210WW | 481    | AAATTACCCTATAGTGCAGAATCTACAGGGGCAAATGGTACATCAGGCCCTATCACCTAG   | 540    |
| 210MM | 481    | .....C.....                                                    | 540    |
| NL4-3 | 478    | .....C..C.....A.....                                           | 537    |
| LAI   | 478    | .....CA.C.....A.....                                           | 537    |
| 210WW | 541    | AACATTAAATGCATGGGTAAAAGTAATAGAAGAGAAGGCTTTCAGCCAGAAAGTAATACC   | 600    |
| 210MM | 541    | G.....                                                         | 600    |
| NL4-3 | 538    | ...T.....G.....                                                | 597    |
| LAI   | 538    | ...T.....G.....                                                | 597    |
| 210WW | 601    | CATGTTTTTCAGCATTATCAGAAGGAGCCACCCACAAGATTTAAACACCATGCTAAACAC   | 660    |
| 210MM | 601    | .....                                                          | 660    |
| NL4-3 | 598    | .....T.....                                                    | 657    |
| LAI   | 598    | .....                                                          | 657    |
| 210WW | 661    | AGTAGGGGACACCAGGCAGCCATGCAAATGTTAAAAGAGACCATCAATGAAGAGGCTGC    | 720    |
| 210MM | 661    | .....A.....T.....A.....                                        | 720    |
| NL4-3 | 658    | ...G.....T..A.....G..A.....                                    | 717    |
| LAI   | 658    | ...G.....T..A.....G..A.....                                    | 717    |
| 210WW | 721    | AGAATGGGATAGATTGCATCCAGTGCATGCAGGGCCTATTGCACCAGGCCAGATGAGAGA   | 780    |
| 210MM | 721    | .....                                                          | 780    |
| NL4-3 | 718    | .....                                                          | 777    |
| LAI   | 718    | .....G.....                                                    | 777    |
| 210WW | 781    | ACCAAGGGGAAGTGACATAGCAGGGACTACTAGCACCCCTTCAGGAACAAATAGGATGGAT  | 840    |
| 210MM | 781    | .....T.....                                                    | 840    |
| NL4-3 | 778    | .....A.....T.....                                              | 837    |
| LAI   | 778    | .....A.....T.....                                              | 837    |
| 210WW | 841    | GACACATAATCCACCTATCCCAGTAGGAGAAATCTATAAAAGATGGATAATCCTGGGACT   | 900    |
| 210MM | 841    | .....                                                          | 900    |
| NL4-3 | 838    | .....T.....                                                    | 897    |
| LAI   | 838    | ...A.....T.....T.....                                          | 897    |
| 210WW | 901    | AAATAAAATAGTAAGAATGTATAGCCCTGTCAGCATTCTGGACATAAGACAAGGGCCAAA   | 960    |
| 210MM | 901    | .....C.....T.....                                              | 960    |
| NL4-3 | 898    | .....AC.....A.....                                             | 957    |
| LAI   | 898    | .....AC.....A.....                                             | 957    |
| 210WW | 961    | GGAACCATTTAGAGATTATGTAGACAGGTTCTATAAACTTTAAGAGCCGAGCAAGCTTC    | 1020   |
| 210MM | 961    | .....C.....                                                    | 1020   |
| NL4-3 | 958    | ...C.....C.....C..A.....C.....                                 | 1017   |
| LAI   | 958    | A...C.....C.....C.....C.....                                   | 1017   |
| 210WW | 1021   | ACAGGAGGTAAAAAATTGGATGACAGAAACCTTGTGGTCCAAAATGCGAACCCAGATTG    | 1080   |
| 210MM | 1021   | .....                                                          | 1080   |
| NL4-3 | 1018   | ...A.....                                                      | 1077   |
| LAI   | 1018   | .....                                                          | 1077   |
| 210WW | 1081   | TAAGACTATCTTAAAAGCATTGGGACCAGCAGCTACACTAGAAGAAATGATGACAGCATG   | 1140   |
| 210MM | 1081   | .....                                                          | 1140   |
| NL4-3 | 1078   | .....T.....G..G.....                                           | 1137   |
| LAI   | 1078   | .....T.....                                                    | 1137   |
| 210WW | 1141   | CCAGGGAGTGGGGGACCTGGCCATAAAGCAAGAGTTTTGGCTGAAGCAATGAGCCAAGT    | 1200   |
| 210MM | 1141   | .....                                                          | 1200   |
| NL4-3 | 1138   | T.....C.....                                                   | 1197   |
| LAI   | 1138   | T.....A.....C.....G.....                                       | 1197   |
| 210WW | 1201   | AACAAATTCAGCTGCCATAATGATGCAGAAAGGTAACCTTTAAAGGCCAAAGAAAAATTGT  | 1260   |
| 210MM | 1201   | .....A.C.....GG.....                                           | 1260   |
| NL4-3 | 1198   | .....C..A.....A.....C..T...GGAA.....G.C...                     | 1257   |
| LAI   | 1198   | .....A.....A.G..C..T...GGAA.....G.....                         | 1257   |
| 210WW | 1261   | TAAGTGCTTCAATTGTGGCAGAGAAGGGCACATAGCCAAAATTCAGGGGCCCTAGGAA     | 1320   |
| 210MM | 1261   | .....T.....C.....A..                                           | 1320   |
| NL4-3 | 1258   | .....T.....A.....C.....                                        | 1317   |
| LAI   | 1258   | .....T.....A.....G.....C.....                                  | 1317   |
| 210WW | 1321   | AAAGGGCTGTTGGAAATGTGGAAAGGAAGGACACCAAATGAAAGATTGTACTGAGAGACA   | 1380   |
| 210MM | 1321   | .....C.T.....                                                  | 1380   |
| NL4-3 | 1318   | .....                                                          | 1377   |
| LAI   | 1318   | .....                                                          | 1377   |
| 210WW | 1381   | GGCTAATTTTTTAGGGAAGCTCTGGCCTTCCAACAAGGGGAGGCCAGGGAATTTTCTCCA   | 1440   |
| 210MM | 1381   | ..T.....T.....                                                 | 1440   |
| NL4-3 | 1378   | .....A.....C.....A.....T.....                                  | 1437   |
| LAI   | 1378   | .....A.....T.....A.....T.....                                  | 1437   |
| 210WW | 1441   | GAGCAGACCAGAGCCAACAGCCCCACCA-----                              | (1468) |
| 210MM | 1441   | .....G.....                                                    | (1468) |
| NL4-3 | 1438   | .....                                                          | (1465) |
| LAI   | 1438   | .....TTCTTCAGAGCAGACCAGAGCCAACAGCCCC                           | 1497   |
| 210WW | (1469) | ---GAAGAGAGCTTCAGGTTTGGGGAAGAGACAACAACCTCCACTCAGAAGCAGGAGCC    | 1524   |
| 210MM | (1469) | .....G.....                                                    | 1524   |
| NL4-3 | (1466) | .....T.....                                                    | 1521   |
| LAI   | 1498   | ACCA.....C..T.....T.....                                       | 1557   |
| 210WW | 1525   | TCTAGACAAGGAACTGTATCCTTTAGCTTCCCTCAGATCACTCTTTGGCAACGACCCCTC   | 1584   |
| 210MM | 1525   | .....                                                          | 1584   |
| NL4-3 | 1522   | GA.....G.....                                                  | 1581   |
| LAI   | 1558   | GA.....                                                        | 1617   |
| 210WW | 1585   | GTCACAATAAAGATAGGGGGCAACTAAAGGAAGCTCTATTAGACACAGGAGCAGATGAT    | 1644   |
| 210MM | 1585   | .....                                                          | 1644   |
| NL4-3 | 1582   | .....T.....T.....                                              | 1641   |
| LAI   | 1618   | .....T.....                                                    | 1677   |
| 210WW | 1645   | ACAGTATTAGAAGAAATGAATTTGCCAGGAAGATGGAAACCAAAAATGATAGGGGGAAAT   | 1704   |
| 210MM | 1645   | .....                                                          | 1704   |
| NL4-3 | 1642   | .....                                                          | 1701   |
| LAI   | 1678   | .....G.....                                                    | 1737   |
| 210WW | 1705   | GGAGGTTTTTATCAAAGTAAGACAGTATGATCAGATACCAATAGAAATCTGCGGACATAAA  | 1764   |
| 210MM | 1705   | .....                                                          | 1764   |
| NL4-3 | 1702   | .....TC.....                                                   | 1761   |
| LAI   | 1738   | .....TC.....T.....                                             | 1797   |
| 210WW | 1765   | GCTATAGGTACAGTTTTAGTAGGACCTACACCTGTCAACATAATTGGAAGAAATCTGTG    | 1824   |
| 210MM | 1765   | .....                                                          | 1824   |
| NL4-3 | 1762   | .....A.....                                                    | 1821   |
| LAI   | 1798   | .....A.....                                                    | 1857   |
| 210WW | 1825   | ACTCAGATTGGCTGCACCTTAAATTTT                                    | 1851   |
| 210MM | 1825   | .....                                                          | 1851   |
| NL4-3 | 1822   | .....                                                          | 1848   |
| LAI   | 1858   | .....T.....                                                    | 1884   |
