# Supplementary material for: Target Cell APOBEC3C Can Induce Limited G-to-A Mutation in HIV-1
Source: PubMed Central journal article supplement (PMC2042017; doi:10.1371/journal.ppat.0030153), 2007-10-26
Supplement: ppat.0030153.sg002.pdf [file ppat.0030153.sg002.pdf]

## A

## Gag Sequences

|       |     |                                                                       |     |
|-------|-----|-----------------------------------------------------------------------|-----|
| 210WW | 1   | <b>MGARASVLSGGKLDKWEKIRLRPGGKKKYKLLKHLVWASRELERFAVNPGLLETSEGCRQI</b>  | 60  |
| 210MM | 1   | ..V.....G.....                                                        | 60  |
| NL4-3 | 1   | .....E.....Q.....I.....                                               | 60  |
| LAI   | 1   | .....E..R.....I.....                                                  | 60  |
| 210WW | 61  | <b>LEQLQPSLKTGSEELRSLFNAVATLYCVHQIDVKDTKEALDKIEEEQNKSKKKAQQAAA</b>    | 120 |
| 210MM | 61  | M.....A.....R.....                                                    | 120 |
| NL4-3 | 61  | .G.....Q.....Y.TI.V.....R.....                                        | 120 |
| LAI   | 61  | .G.....Q.....Y.T.....R.EI.....                                        | 120 |
| 210WW | 121 | <b>DTGSCSSQVSQNYPIVQNLQGQMVHQALSPRTLNAWVKVIEEKAFSPEVIPMFSALSEGA</b>   | 180 |
| 210MM | 121 | ...N.....                                                             | 180 |
| NL4-3 | 121 | ...N-N.....I.....V.....                                               | 179 |
| LAI   | 121 | ...H-.....I.....I.....V.....                                          | 179 |
| 210WW | 181 | <b>TPQDLNNTMLNTVGGHQAAMQMLKETINEEAAEWDRLLHPVHAGPIAPGQMREPRGSDIAGT</b> | 240 |
| 210MM | 181 | .....                                                                 | 240 |
| NL4-3 | 180 | .....                                                                 | 239 |
| LAI   | 180 | .....V.....                                                           | 239 |
| 210WW | 241 | <b>TSTLQEQIGWMTHNPPPIVGEIYKRWIILGLNKIVRMYSILDIRQGPKEPFRDYVDR</b>      | 300 |
| 210MM | 241 | .....                                                                 | 300 |
| NL4-3 | 240 | .....T.....                                                           | 299 |
| LAI   | 240 | .....N.....T.....                                                     | 299 |
| 210WW | 301 | <b>FYKTLRAEQASQEVKNWMTETLLVQANANPDCKTILKALGPAATLEEMMTACQGVGGPGHK</b>  | 360 |
| 210MM | 301 | .....                                                                 | 360 |
| NL4-3 | 300 | .....G.....                                                           | 359 |
| LAI   | 300 | .....                                                                 | 359 |
| 210WW | 361 | <b>ARVLAEAMSQVTNSAAIMMQKGNFKGQRKIVKCFNCGREGHIAKNCRGPRKKGWCWCKGKE</b>  | 420 |
| 210MM | 361 | .....S.....R.....A.....                                               | 420 |
| NL4-3 | 360 | .....P.T..I.....RN..T.....K.....A.....                                | 419 |
| LAI   | 360 | .....T...R...RN.....K....R..A.....                                    | 419 |
| 210WW | 421 | <b>GHQMKDCTERQANFLGKLWPSNKGRPGNFLQSRPEPTAPP-----EESFRFGE</b>          | 468 |
| 210MM | 421 | .....I..V.....-----                                                   | 468 |
| NL4-3 | 420 | .....I..H.....-----                                                   | 467 |
| LAI   | 420 | .....I..Y.....FLQSRPEPTAPP.....S.V                                    | 479 |
| 210WW | 469 | <b>ETTTPTQKQEPLDKELYPLASLRSLFGNDPSSQ</b>                              | 501 |
| 210MM | 469 | .....                                                                 | 501 |
| NL4-3 | 468 | .....S.....I.....S.....                                               | 500 |
| LAI   | 480 | .....S.....I.....T.....                                               | 512 |

## B

## Protease Sequences

|       |    |                                                                    |    |
|-------|----|--------------------------------------------------------------------|----|
| 210WW | 1  | <b>PQITLWQRPLVTIKIGGQLKEALLDTGADDTVLEEMNLPGRWPKMIGGIGGFIKVRQYD</b> | 60 |
| 210MM | 1  | .....V.....                                                        | 60 |
| NL4-3 | 1  | .....                                                              | 60 |
| LAI   | 1  | .....S.....                                                        | 60 |
| 210WW | 61 | <b>QIPIEICGHKAIGTVLVGPTPVNIIGRNLLTQIGCTLNF</b>                     | 99 |
| 210MM | 61 | .....A.....                                                        | 99 |
| NL4-3 | 58 | ..L.....                                                           | 99 |
| LAI   | 58 | ..L.....                                                           | 99 |
