# Supplementary material for: Target Cell APOBEC3C Can Induce Limited G-to-A Mutation in HIV-1
Source: PubMed Central journal article supplement (PMC2042017; doi:10.1371/journal.ppat.0030153), 2007-10-26
Supplement: ppat.0030153.sg003.pdf [file ppat.0030153.sg003.pdf]

**A**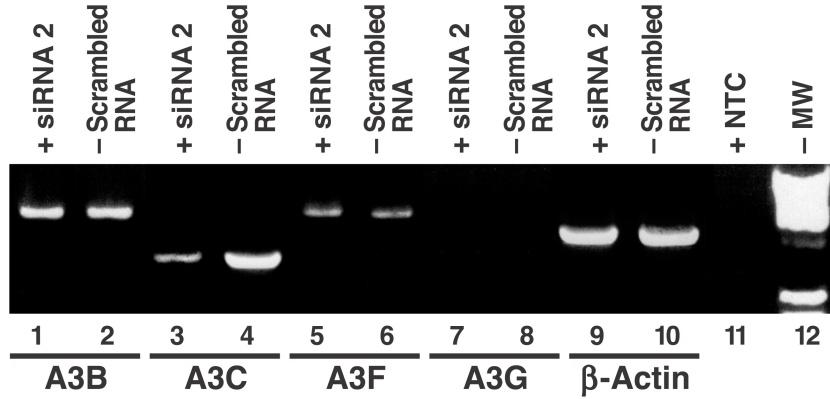**B****210WW Sequences**

1 40  
**Plasmid** TCAGATCACTCTTTGGCAACGACCCCTCGTCACAATAAAG

293T + Scrambled RNA ...  $\frac{G}{A}$  .....  $\frac{G}{A}$  .....  
 293T + siRNA 2 .....

41 80  
**Plasmid** ATAGGGGGGCAACTAAAGGAAGCTCTATTAGACACAGGAG

293T + Scrambled RNA .....  $\frac{GG}{AA}$  .....  $\frac{G}{A}$  .....  $\frac{GG}{AA}$  .....  
 293T + siRNA 2 .....  $\frac{G}{A}$  .....

81 120  
**Plasmid** CAGATGATACAGTATTAGAAGAAATGAATTTGCCAGGAAG

293T + Scrambled RNA ..  $\frac{G}{A}$  ..  $\frac{G}{A}$  .....  $\frac{G}{A}$  ..  $\frac{G}{A}$  .....  $\frac{G}{A}$  ..  $\frac{G}{A}$  .....  
 293T + siRNA 2 .....  $\frac{G}{A}$  ..  $\frac{G}{A}$  ..  $\frac{G}{A}$  .. ..

121 160  
**Plasmid** ATGGAAACCAAAAATGATAGGGGAATTGGAGGTTTATC

293T + Scrambled RNA ..  $\frac{GG}{AA}$  .....  $\frac{GG}{AA}$  ..  $\frac{A}{A}$  .....  
 293T + siRNA 2 ..  $\frac{G}{A}$  .....  $\frac{G}{A}$  .. ..

161 200  
**Plasmid** AAAGTAAGACAGTATGATCAGATACCAATAGAAATCTGCG

293T + Scrambled RNA .....  $\frac{G}{A}$  .....  $\frac{G}{A}$  ..  $\frac{G}{A}$  .....  $\frac{G}{A}$  .....  
 293T + siRNA 2 .....  $\frac{G}{A}$  .. ..

**C**

| Base Composition | Plasmid | 293T + Scr. RNA | 293T + siRNA 2 |
|------------------|---------|-----------------|----------------|
| A                | 77      | 100             | 84             |
| C                | 32      | 32              | 32             |
| G                | 49      | 26              | 42             |
| T                | 42      | 42              | 42             |
